# Supplementary material
Source: PubMed Central journal article supplement (PMC8808837)
Supplement: sj-pdf-1-car-10.1177_19476035211018857.pdf [file sj-pdf-1-car-10.1177_19476035211018857.pdf]

# FIFA Medical Centers of Excellence Cartilage Questionnaire

This questionnaire is part of a FIFA approved and supported study aimed to report on the demographics and epidemiology of knee cartilage injuries and the management of knee cartilage injuries across FIFA centers of excellence. Success of this study depends on your center's co-operation. We ask you to base your answers on genuine data collected by your center and provide your best estimation wherever formal data is absent. We appreciate your co- operation and look forward to your responses.

\* Required

1. Email address \*

---

2. Which country is your center located in ?

---

3. Which city is your center located in ?

---

Over the past 10 years, how many soccer players were treated for a diagnosis of knee cartilage injury at your center ? please specify the number, mean patient age, age range, gender distribution and level of participation.

4. Number of patients:

---

5. Mean patients age:

---

6. Minimum age:

---

7. Maximum age:

---

8. Rate of male patients (%):

---

9. Rate of professional players (%):

---

Over the past three years, what was the annual average number of soccer related cartilage injuries treated at your center?

10. Average number per year

---

Based on your 10 year experience, please specify the etiology of soccer related cartilage injuries treated at your center. (Rate for each etiology).

11. Traumatic (%)

---

12. Congenital (OCD) (%)

---

13. Combined Traumatic/Congenital (%)

---

14. Overload (%)

---

15. Osteoarthritis (%)

---

16. Other (please specify)

---

Based on your 10 year experience, please state the rate of soccer players presented with cartilage injury/defect in each knee location. For each location also state the mean area of defect (square cm).

17. Lateral Femoral Condyle (%)

---

18. Lateral Femoral Condyle - mean area (square cm)

---

19. Medial Femoral Condyle (%)

---

20. Medial Femoral Condyle - mean area (square

---

21. Lateral Tibial Plateau

---

22. Lateral Tibial Plateau - mean area (square cm)

---

23. Medial Tibial Plateau (%)

---

24. Medial Tibial Plateau - mean area (square cm)

---

25. Patella (%)

---

26. Patella - mean area (square cm)

---

27. Trochlea (%)

---

28. Trochlea - mean area (square

---

What was the rate of bi-polar lesions noted in this group of patients?

Please write "0" if none of the patients had bipolar lesions in the relevant compartment

29. Medial Compartment (%)

---

30. Lateral Compartment (%)

---

31. Patellofemoral Compartment (%)

---

Based on your 10 year experience, what was the distribution between treatment strategies for cartilage injuries: Non-operative vs. operative (%)

32. Non-operative (%)

---

33. Operative (%)

---

For non-operative treatments over the past 10 years, what was the distribution between treatment options (% of patients who were treated with the specific treatment) ?

34. Physical Therapy

---

35. Intra-articular Steroids

---

36. Intra-articular Hyaluronic Acid (%)

---

37. Intra-articular Platelet Rich Plasma (%)

---

38. Intra-articular Fat Based Stem Cells (%)

---

39. Intra-articular Bone Marrow Aspirate (%)

---

40. Other (Please Specify)

---

---

---

---

---

For surgical treatments over the past 10 years, what was the distribution between treatment options (% of patients who were treated with the specific treatment) ?

41. Debridement

---

42. Open reduction internal fixation

---

43. Bone Marrow Stimulation, Micro Fracture (%)

---

44. Osteochondral Allograft Transplantation (%)

---

45. Osteochondral Autograft Transplantation (%)

---

46. Autologous Chondrocytes Implantation (%)

---

47. Osteotomy for Coronal Malalignment (%)

---

48. Osteotomy for Patella Malalignment or Unloading (%)

---

49. Other (Please specify)

---



---



---



---



---

Which diagnostic criteria did you use to indicate surgical intervention for surgically treated players ?

50. For each criteria please choose its importance in the decision making process

*Mark only one oval per row.*

|                                   | The most important    | Very important        | Moderately important  | Mildly important      | Not important, was not used |
|-----------------------------------|-----------------------|-----------------------|-----------------------|-----------------------|-----------------------------|
| Failure of conservative treatment | <input type="radio"/>       |
| Knee symptoms                     | <input type="radio"/>       |
| Lesion characteristics            | <input type="radio"/>       |
| Lesion location                   | <input type="radio"/>       |
| Player age                        | <input type="radio"/>       |
| Player level of activity          | <input type="radio"/>       |
| Player preference                 | <input type="radio"/>       |
| Failure of prior surgery          | <input type="radio"/>       |



51. Other criteria (please specify)

---

---

---

---

---

In the specific group of high level soccer players (professional, collegiate), please note the number of knee osteotomies performed over the past 10 years.

52. Patellofemoral (number)

---

53. Varus producing, symptomatic lateral compartment (number)

---

54. Valgus producing, symptomatic medial compartment (number)

---

Base on your center's experience, what was the rate of return to play for :

55. Players treated non-operatively (%)

---

56. Players treated operatively (%)

---

What was the average time (weeks) lost to injury (complete absence from training/games) for:

57. Players treated non-operatively (weeks)

---

58. Players treated operatively (weeks)

---

What was the average time (weeks) to return to play (participation in games) for:

59. Players treated non-operatively (weeks)

---

60. Players treated operatively (weeks)

---

In you experience, what were the reasons for not returning to play after surgery?

61. Please rate each reason based on its prevalence among patients who didn't return to play

Mark only one oval per row.

|                                    | 0%                    | <10%<br>of<br>players | 10-25%<br>of<br>players | 25-50%<br>of<br>players | 50-75%<br>of<br>players | 75-100%<br>of<br>players |
|------------------------------------|-----------------------|-----------------------|-------------------------|-------------------------|-------------------------|--------------------------|
| Not reaching the same level play   | <input type="radio"/> | <input type="radio"/> | <input type="radio"/>   | <input type="radio"/>   | <input type="radio"/>   | <input type="radio"/>    |
| Recurrent knee symptoms            | <input type="radio"/> | <input type="radio"/> | <input type="radio"/>   | <input type="radio"/>   | <input type="radio"/>   | <input type="radio"/>    |
| Player fear from returning to play | <input type="radio"/> | <input type="radio"/> | <input type="radio"/>   | <input type="radio"/>   | <input type="radio"/>   | <input type="radio"/>    |
| Additional unrelated injury        | <input type="radio"/> | <input type="radio"/> | <input type="radio"/>   | <input type="radio"/>   | <input type="radio"/>   | <input type="radio"/>    |
| Failure of surgery                 | <input type="radio"/> | <input type="radio"/> | <input type="radio"/>   | <input type="radio"/>   | <input type="radio"/>   | <input type="radio"/>    |
| Contract issues                    | <input type="radio"/> | <input type="radio"/> | <input type="radio"/>   | <input type="radio"/>   | <input type="radio"/>   | <input type="radio"/>    |

62. Other reasons (please specify)

---



---



---



---



---

Does your center follow a treatment algorithm for the management of cartilage injuries? If yes – please specify

63. Algorithm specifications

---

---

---

---

---

---
